# Supplementary material for: Inactivation of the CIC-DUX4 oncogene through P300/CBP inhibition, a therapeutic approach for CIC-DUX4 sarcoma
Source: PubMed Central journal article supplement (PMC8511258; doi:10.1038/s41389-021-00357-4), 2021-10-12
Supplement: 41389_2021_357_MOESM4_ESM.pdf [file 41389_2021_357_MOESM4_ESM.pdf]

## Supplementary Figure 4

**A**

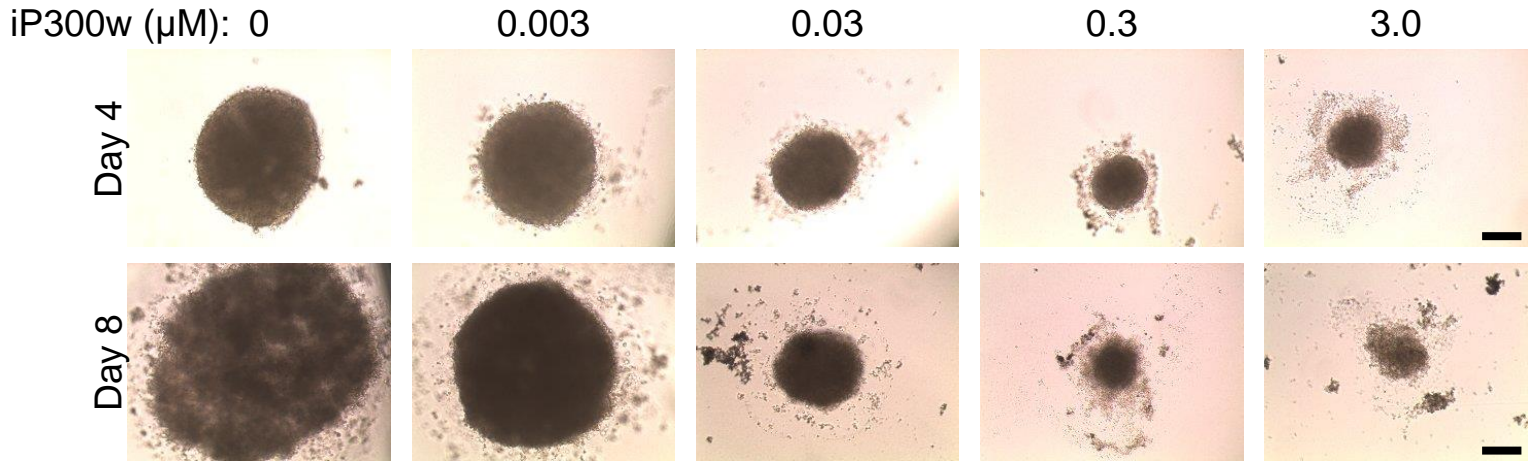

**B**

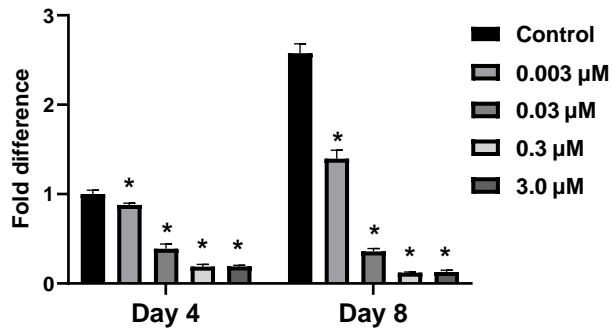

### Supplementary Figure 4. Morphology of NCC-CDS-X1 spheroids at day 4 and 8 of treatment.

- A. Representative picture of spheroids treated with various concentration of iP300w. Scale bar 50  $\mu\text{m}$ .
- B. Summary of the size of the spheroids presented in "A". Data were presented as fold difference to the control at day 4, n=6. Statistical significance was calculated by two-way ANOVA.
