# Supplementary material for: Inactivation of the CIC-DUX4 oncogene through P300/CBP inhibition, a therapeutic approach for CIC-DUX4 sarcoma
Source: PubMed Central journal article supplement (PMC8511258; doi:10.1038/s41389-021-00357-4), 2021-10-12
Supplement: 41389_2021_357_MOESM6_ESM.pdf [file 41389_2021_357_MOESM6_ESM.pdf]

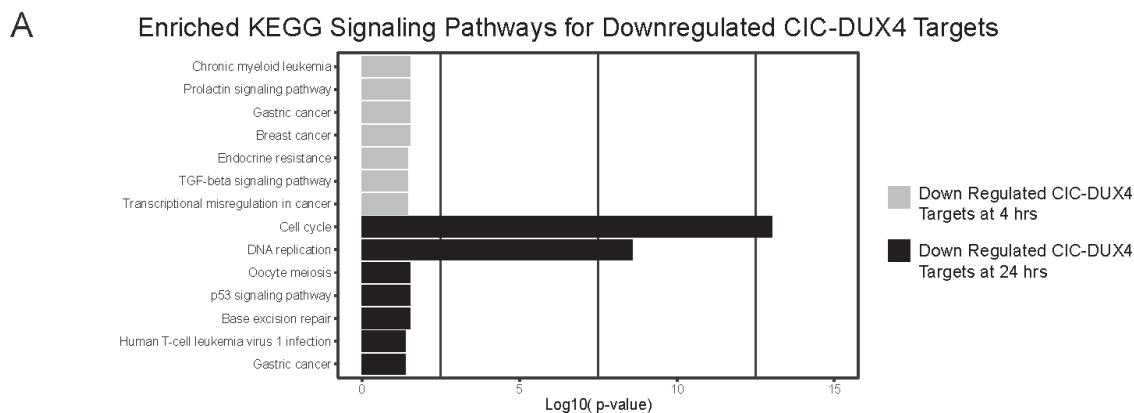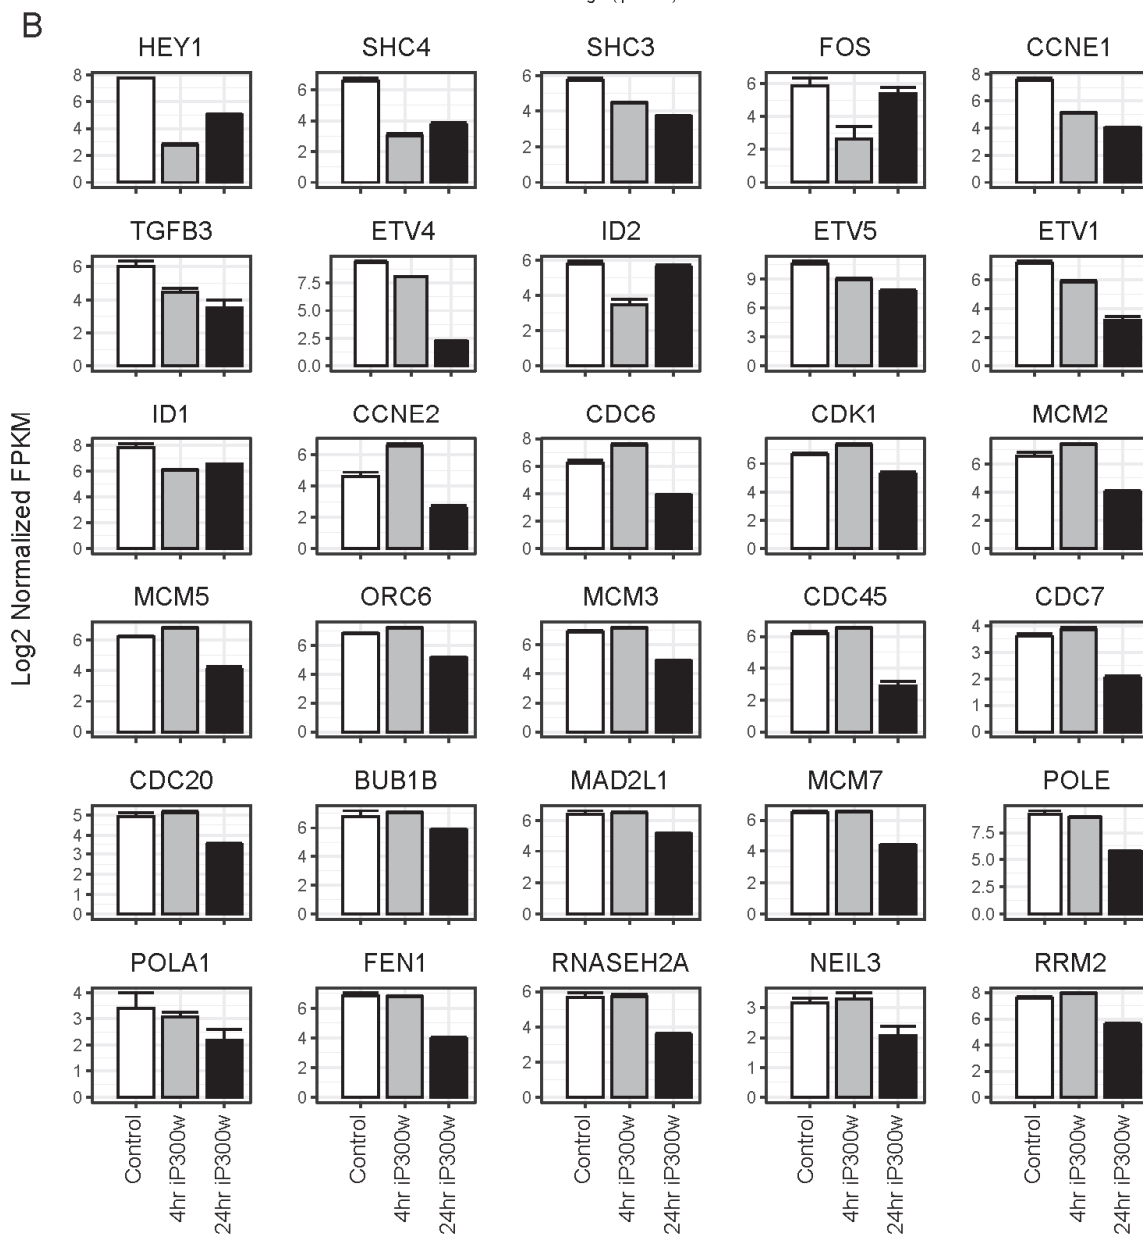

**Supplementary Figure 6.** Pathway Analysis for targets of CIC-DUX4 downregulated upon treatment with iP300w.

A. Enriched KEGG pathways (hypergeometric test, Benjamini-Hochberg adjusted p-value < 0.05) of the downregulated genes at 4 hours (gray) and 24 hours (black) that have previously been identified as CIC-DUX4 targets (Okimoto et al., 2019).

B. Barplots of log2 transformed FPKM values for genes in enriched KEGG pathways in (A) for the control (white), 4 hours (gray) and 24 hours (black) conditions.
