# Supplementary material for: Inactivation of the CIC-DUX4 oncogene through P300/CBP inhibition, a therapeutic approach for CIC-DUX4 sarcoma
Source: PubMed Central journal article supplement (PMC8511258; doi:10.1038/s41389-021-00357-4), 2021-10-12
Supplement: 41389_2021_357_MOESM7_ESM.pdf [file 41389_2021_357_MOESM7_ESM.pdf]

## Supplementary Figure 7

**A**

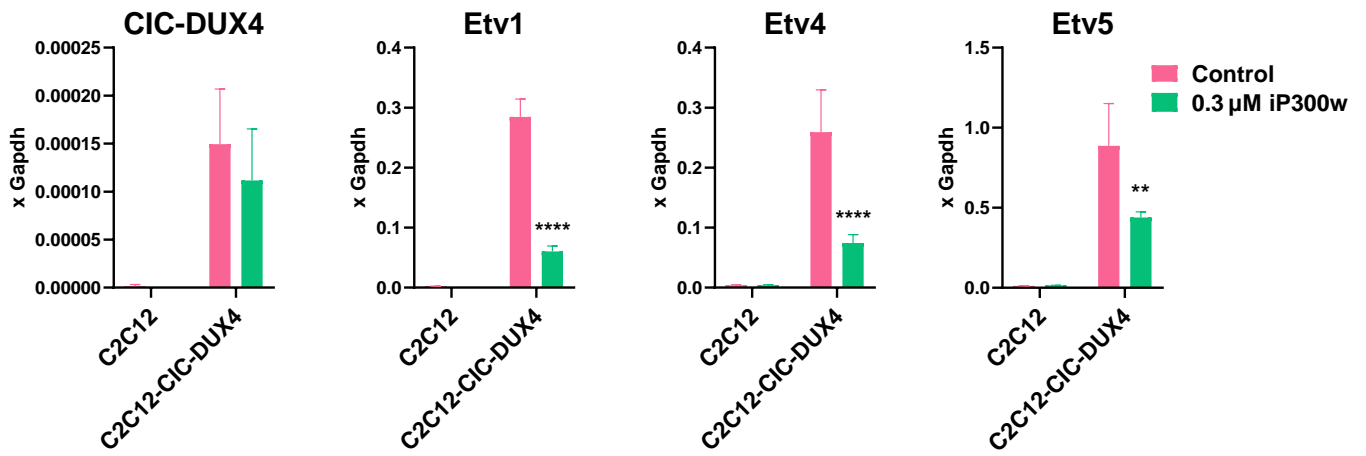

**B**

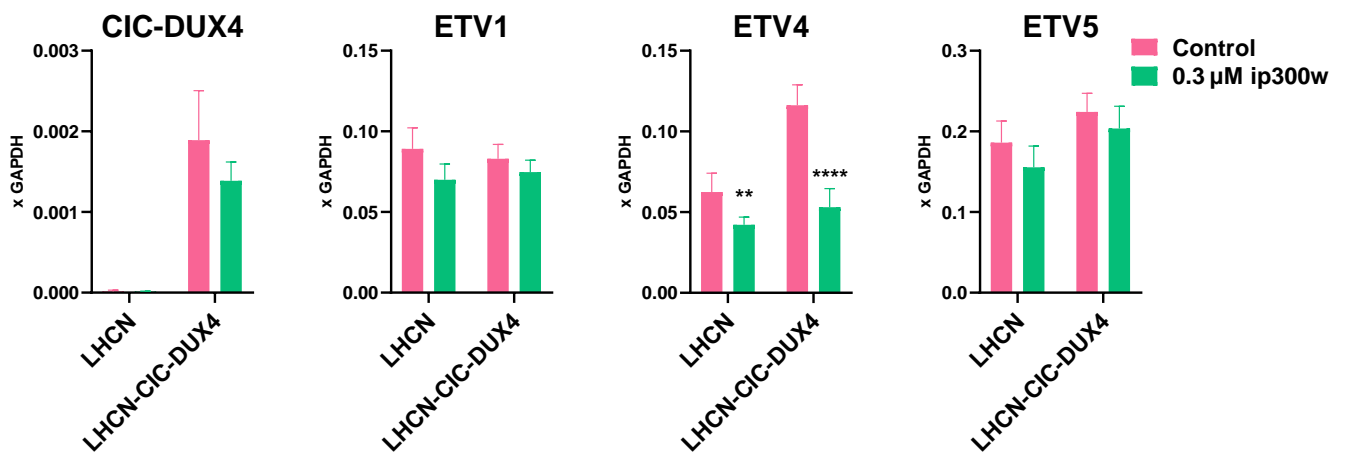

**C**

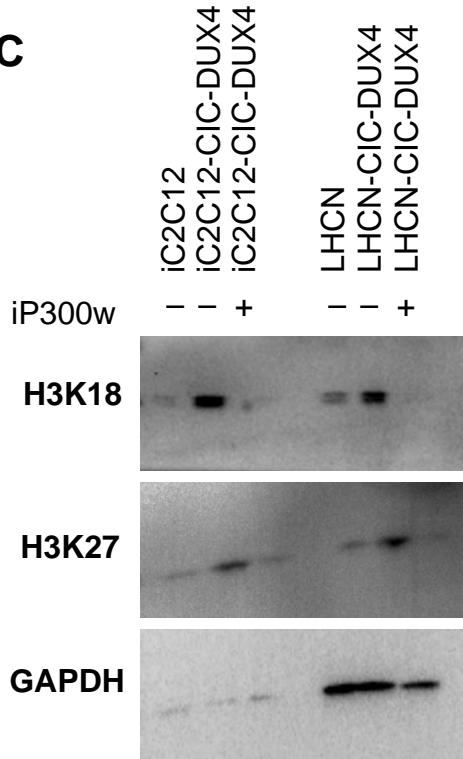

### Supplementary Figure 7. Effects of ip300w on mouse and human myoblast cell lines.

- RT-qPCR for CIC-DUX4 target genes in C2C12-CIC-DUX4 mouse myoblasts treated with 0.3 μM ip300w for 18 hours.
- RT-qPCR for CIC-DUX4 target genes in LHCN-CIC-DUX4 human myoblasts treated with 0.3 μM ip300w for 18 hours.
- Western blots for acetylated H3K18 and H3K27 in the conditions presented in A and B, above.
